# Supplementary material
Source: Springer Nature journal article supplement (https://www.springermedizin.de/resource/supplementary/12943_2003_46_MOESM6_ESM.pdf/9553318)

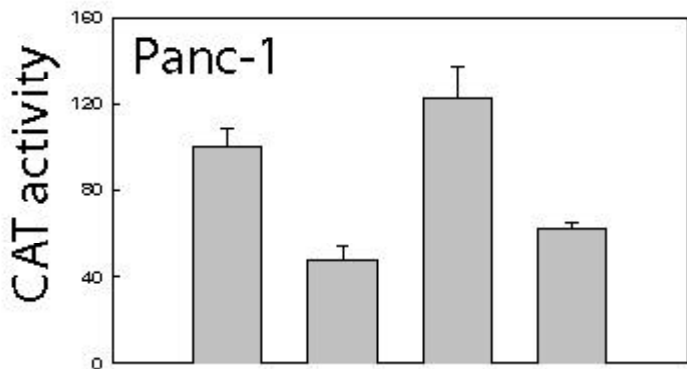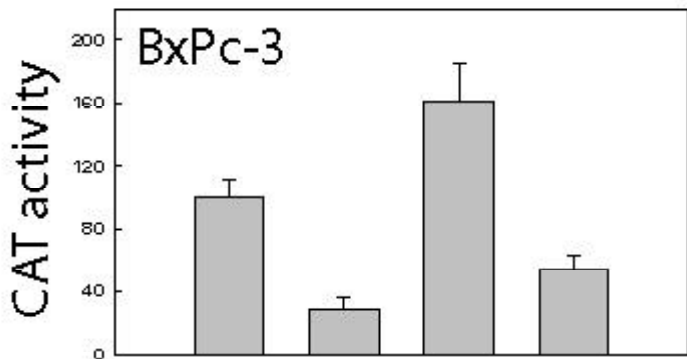

|          |   |   |   |   |
|----------|---|---|---|---|
| p8-CAT   | + | + | + | + |
| RafBxB   |   | + |   |   |
| Erk2     |   |   |   | + |
| RafK375W |   |   | + |   |

Supplement: MOESM6 [file 9553318]
